# Supplementary material for: Isolation and functional analysis of acid-producing bacteria from bovine rumen
Source: PeerJ. 2023 Oct 18;11:e16294. doi: 10.7717/peerj.16294 (PMC10590097; doi:10.7717/peerj.16294)
Supplement: Supplemental Information 2 [file peerj-11-16294-s002.xlsx]

## Sheet: Sheet1
Ingredient and nutrient composition for per kilogram feed.
Ingredient	Content(g/kg)
corn	277
silo corn	250
wheat straw	80
alfalfa	35
bran	60
cottonseed meal	80
soybean meal	80
rapseed meal	100
salt	20
urea	3
molasses	5
premix	10
Note: Each kilogram of premix contains 200g stone powder, 80g calcium hydrogen phosphate, 5g copper, 0.3g selenium,50g manganese,45g zinc,1g iodine,1g selenium, 35 Chang iron, 0.5 Chang cobalt, 1000 kIU vitamin D, 50kIU Vitamin E and 2500 kIU Vitamin A.
