# Supplementary material for: Isolation and functional analysis of acid-producing bacteria from bovine rumen
Source: PeerJ. 2023 Oct 18;11:e16294. doi: 10.7717/peerj.16294 (PMC10590097; doi:10.7717/peerj.16294)
Supplement: Supplemental Information 3 [file peerj-11-16294-s003.xlsx]

## Sheet: Sheet1
		Weight (Kg)
	Times (d)	0	3	6	9	12	15	18
	NC1	37.25	37.25	38.1	38.65	38.8	38.4	38.6
	NC2	24.25	24	24.3	25.05	25.35	25.1	25.35
	NC3	32.75	32.35	32.65	34.5	34.95	34.6	35.5
	NC4	25.4	24.65	25.05	25.9	26.5	26.75	26.95
	NC5	34.15	34.15	34.95		35.95	37	37.65
	NC6	24.65	24.85	24.15	25.75	26.4	26.25	26.5
	NC7	29.7	29.35	29.45	29.45	31.2	31.5	31.7
	TG1	37.35	38.25	38.25	38.65	40.6	41.45	42.3
	TG2	22.55	22.1	22.15	22.75	24	24.6	25
	TG3	38.2	37.95	38.9	39.2	39.8	40.6	41
	TG4	34.8	34.6	35	35.9	36.4	37.45	37.85
	TG5	33.7	33.7	34.3	34.9	36.1	36.8	37.3
	TG6	31.05	30.4	31.8	31.6	32.2	33.6	34.1
